# Supplementary material for: MYB Transcriptional Factors Affects Upstream and Downstream MEP Pathway and Triterpenoid Biosynthesis in Chlamydomonas reinhardtii
Source: MDPI journal article supplement (doi:10.3390/pr12030487), 2024-02-28
Supplement: s1 [file s1]

Archive with 1 entries (1 files):
- processes-2748661-supplementary.pdf
